# Supplementary material for: Effect of sodium–glucose cotransporter-2 inhibitors on aldosterone-to-renin ratio in diabetic patients with hypertension: a retrospective observational study
Source: Springer Nature journal article supplement (doi:10.1186/s12902-020-00656-8), 2020-11-30

**Supplemental Figure S2.**

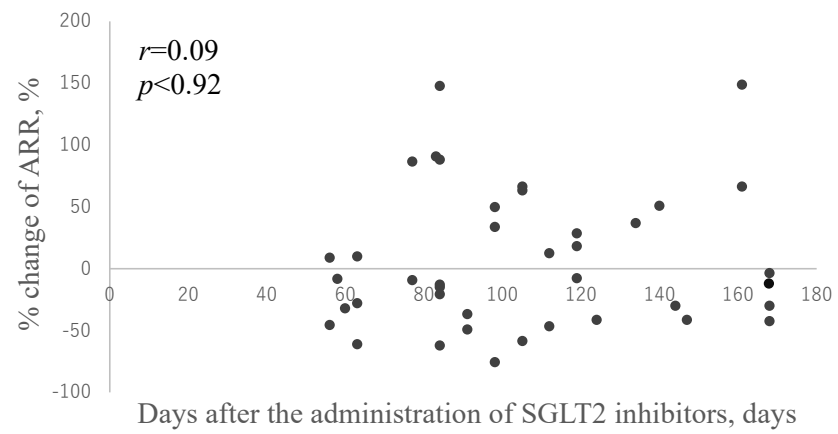

Supplement: MOESM4 [file 18641910]
